# Supplementary material
Source: Springer Nature journal article supplement (https://www.springermedizin.de/resource/supplementary/12916_2012_580_MOESM3_ESM.pdf/9597926)

Articles

140000  
120000  
100000  
80000  
60000  
40000  
20000  
0

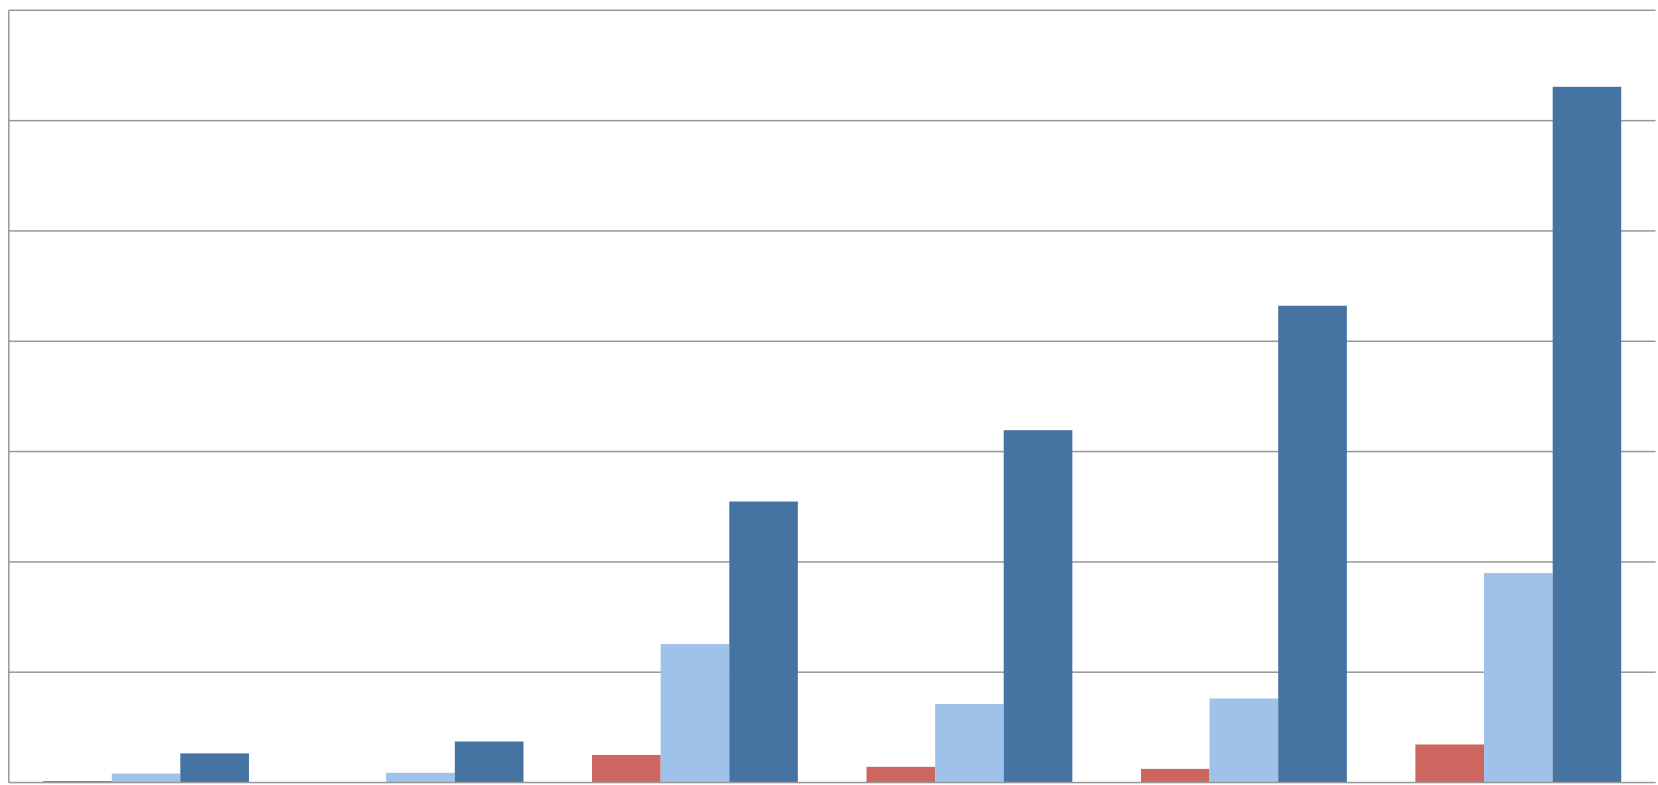

Oceania

Africa

Latin America

North America

Asia

Europe

Geographic Region

2000 2005 2011

Supplement: MOESM3 [file 9597926]
